# Supplementary material for: Defined three-dimensional culture conditions mediate efficient induction of definitive endoderm lineage from human umbilical cord Wharton’s jelly mesenchymal stem cells
Source: PubMed Central journal article supplement (PMC5111269; doi:10.1186/s13287-016-0426-9), 2016-11-16

## **Supplementary Information**

**Defined three-dimensional culture conditions mediate efficient induction of Definitive Endoderm lineage from human umbilical cord- Wharton's Jelly- Mesenchymal Stem Cells.**

**Ashraf Al Madhoun <sup>1,\*,#</sup>, Hamad Ali <sup>1,2,\*</sup>, Sarah AlKandari <sup>1</sup>, Valerie Lopez Atizado <sup>1</sup>, Nadeem Akhter <sup>1</sup>, Fahd Al-Mulla <sup>3</sup> and Maher Atari <sup>4</sup>.**

**Table 1: Primary Antibodies used for Flow Cytometry characterization of differentiated cells**

| Antibody | Conjugate     | Manufacturer  | Catalogue Number |
|----------|---------------|---------------|------------------|
| CXCR4    | PHYCOERYTHRIN | BD Pharmingen | 551966           |
| FOXA2    | --            | BD Pharmingen | 561580           |
| SOX17    | --            | BD Pharmingen | 561590           |
| BraT     | --            | R&D           | AF2085           |

**Table 2: Oligonucleotide sequences of primers utilized for real-time qRT-PCR.**

| Genes | Forward Primer (5'-3')  | Reverse Primer (5'-3')  |
|-------|-------------------------|-------------------------|
| GAPDH | GGAGCGAGATCCCTCCAAAAT   | GGCTGTTGTCATACTTCTCATGG |
| S18   | ATCACCATTATGCAGAATCCACG | GACCTGGCTGTATTTTCCATCC  |
| Meox1 | GCAGGGGGTTCCAAGGAAAT    | GTCAGGTAGTTATGATGGGCAAA |
| Bra T | CTGGGTACTCCCAATGGGG     | GGTTGGAGAATTGTTCCGATGA  |
| AMN   | GTCCCAACACGGACTTCG      | CATGTCTGAGACGGCGTGAC    |
| AFP   | AGTGAGGACAACTATTGGCCT   | ACACCAGGGTTTACTGGAGTC   |
| FOXA2 | GGAGCAGCTACTATGCAGAGC   | CGTGTTTCATGCCGTTTCATCC  |
| FOXA3 | AGTGGAGCTACTACCCGGAG    | GCTTAGAGGATTCAGGGTCATG  |
| SOX17 | TTTCATGGTGTGGGCTAAGGA   | TTGTAGTTGGGGTGGTCTCTG   |
| GSC1  | AACGCGGAGAAGTGAACAAG    | CTGTCCGAGTCCAAATCGC     |
| CXCR4 | ACTACACCGAGGAAATGGGCT   | CCCACAATGCCAGTTAAGAAGA  |
| FOX7  | GCCAAGGACGAGAGGAAAC     | GTTGGGGTAGTCCTGCATGT    |
| HNF1b | GTGGACCGGATGCTCAGTG     | GGGTCTTCATAGGGGTGCC     |

## FIGURE LEGENDS

**Supplemental Figure 1. Immunofluorescence of the differentiated WJ-MSCs.** Confocal laser representative images for differentiated WJ-MSCs at days 3 and 7 as indicated. Immunofluorescence using APEX-labeling system for conjugating primary antibodies (BraT-Alexa 488; Sox17- and FoxA2- Alexa 594), CXCR4-PE conjugated. The magnification is 200X.

**Supplemental Figure 2. Flow cytometric analysis of the definitive endoderm bona fide marker CXCR4 at day 7.** Unlike the differentiated WJ-MSCs, human adult fibroblast subjected to the same differentiation protocol failed to express CXCR4 suggesting that specification of the experimental protocol to WJ-MSCs. Nonspecific binding to the fibroblast cell surface was observed for both IgG and CXCR4 antibodies. Examples of flow cytometric images from a representative experiment. Data are shown as mean  $\pm$  s.e.m. (n = 3).

# Supplement Figure 1

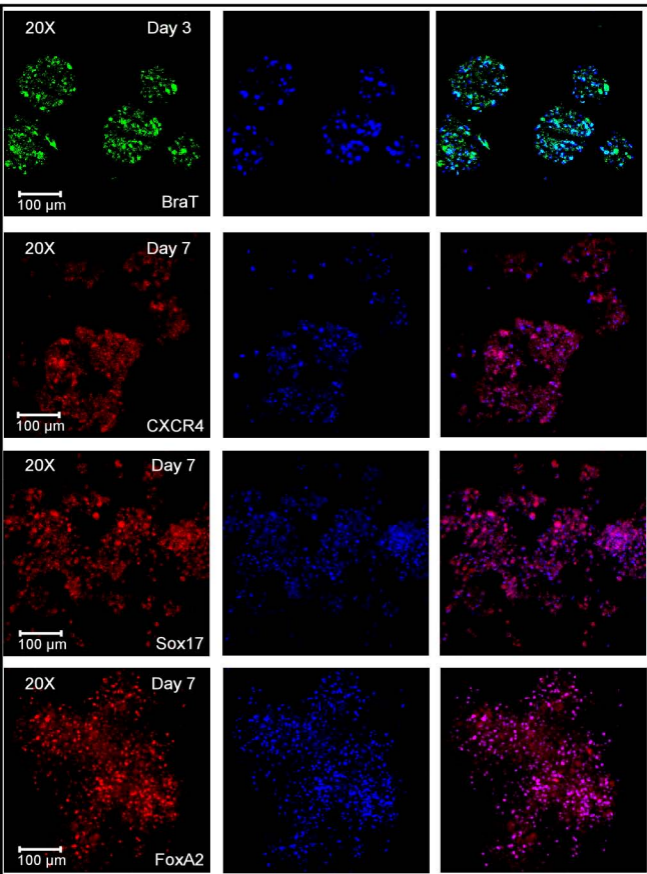

# Supplemental Figure 2

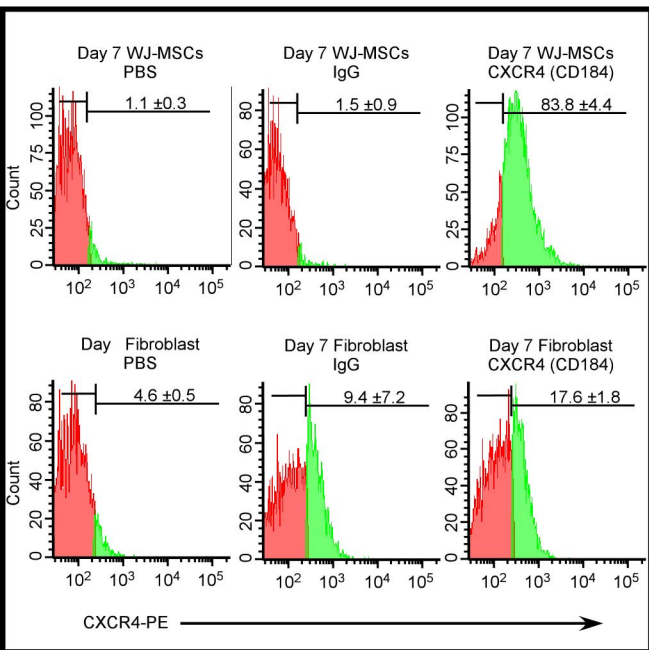

Supplement: 13287_2016_426_MOESM1_ESM.pdf [file 13287_2016_426_MOESM1_ESM.pdf]
